# Supplementary material
Source: publisher figshare collection journal article supplement (https://acs.figshare.com/ndownloader/files/18238994)
Supplement: Supplementary file 1 [file 18238994]

# Supporting Information

## Multiple Binding Configurations of Fis Protein Pairs on DNA:

### Facilitated Dissociation versus Cooperative Dissociation

Min-Yeh Tsai,<sup>1,3,4</sup> Weihua Zheng,<sup>1,3</sup> Mingchen Chen,<sup>1,2</sup> and Peter G. Wolynes<sup>1,3\*</sup>

<sup>1</sup>*Department of Chemistry,* <sup>2</sup>*Department of Bioengineering,* and <sup>3</sup>*Center for Theoretical*

*Biological Physics, Rice University, Houston, Texas 77005, United States*

<sup>4</sup>*Department of Chemistry, Tamkang University, New Taipei City, Taiwan (R.O.C.) 25137*

E-mail: pwolynes@rice.edu

## Table of Contents

|                                                                                                                                                                                     |          |
|-------------------------------------------------------------------------------------------------------------------------------------------------------------------------------------|----------|
| <b>Figure S1. Free energy surfaces as a function of several of trial collective coordinates are shown.</b>                                                                          | <b>2</b> |
| <b>Figure S2. The trial collective basis variables that are used in the principal component analysis.</b>                                                                           | <b>3</b> |
| <b>Figure S3. The structural ensemble of the binary-Fis configuration and their mutual dynamic switching are schematically shown.</b>                                               | <b>4</b> |
| <b>Figure S4. A free energy surface survey (free energy projected onto PC3-PC1) over a range of Fis mutants for the stability change of the binary-Fis molecular dyad is shown.</b> | <b>5</b> |
| <b>Figure S5. The correlation plot of the Fis transcription activity in relation to different thermodynamic properties due to mutation effects is shown.</b>                        | <b>6</b> |

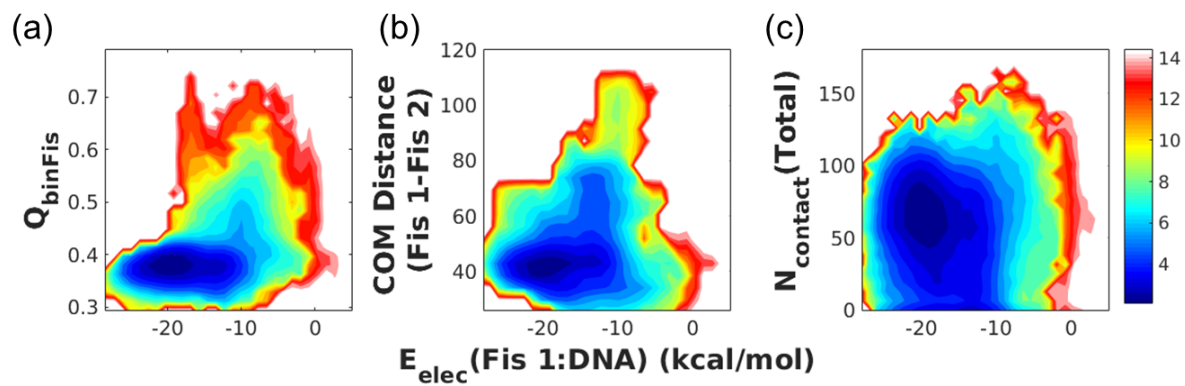

Figure S1. Free energy surfaces as a function of several of trial collective coordinates are shown.

(a)  $Q$  value of the binary-Fis configuration ( $Q_{\text{binFis}}$ ) (b) Center-of-mass distance between Fis1 and Fis2 on the DNA (c) The total number of protein contacts ( $N_{\text{contact}}$ ).

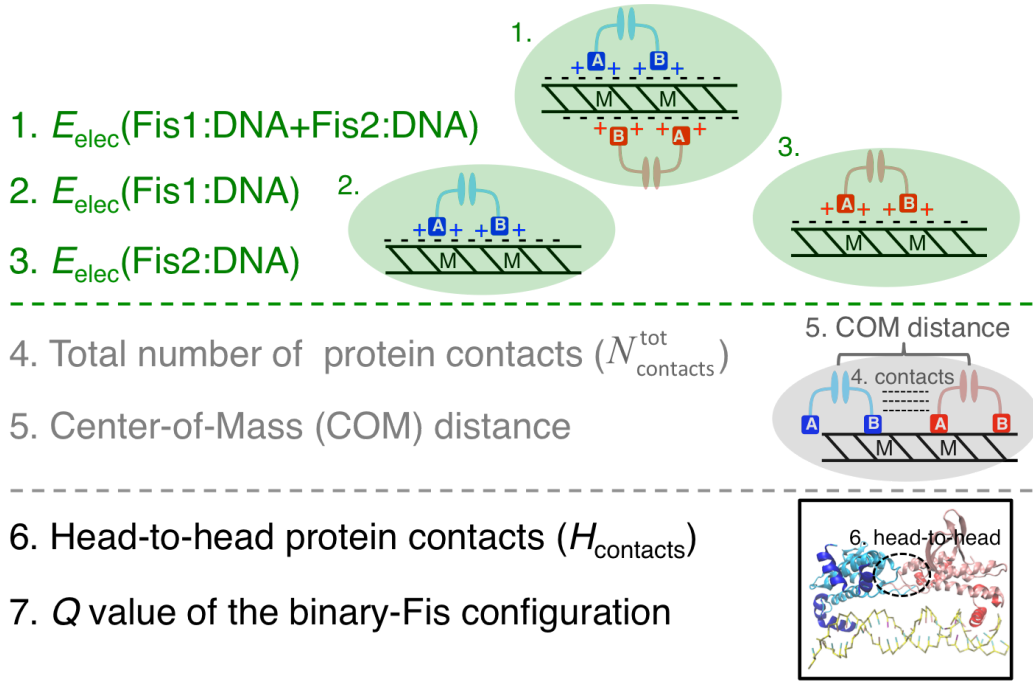

Figure S2. The trial collective basis variables that are used in the principal component analysis. These collective variables are grouped. (*Top*) Items 1-3 (in green) describe the electrostatic interactions between the protein and DNA. (*Middle*) Items 4-5 (in gray) describe physical protein contacts and geometric position between proteins on DNA. (*Bottom*) Items 6-7 describe structural specificity that distinguishes several of the particular protein quaternary structures from each other.

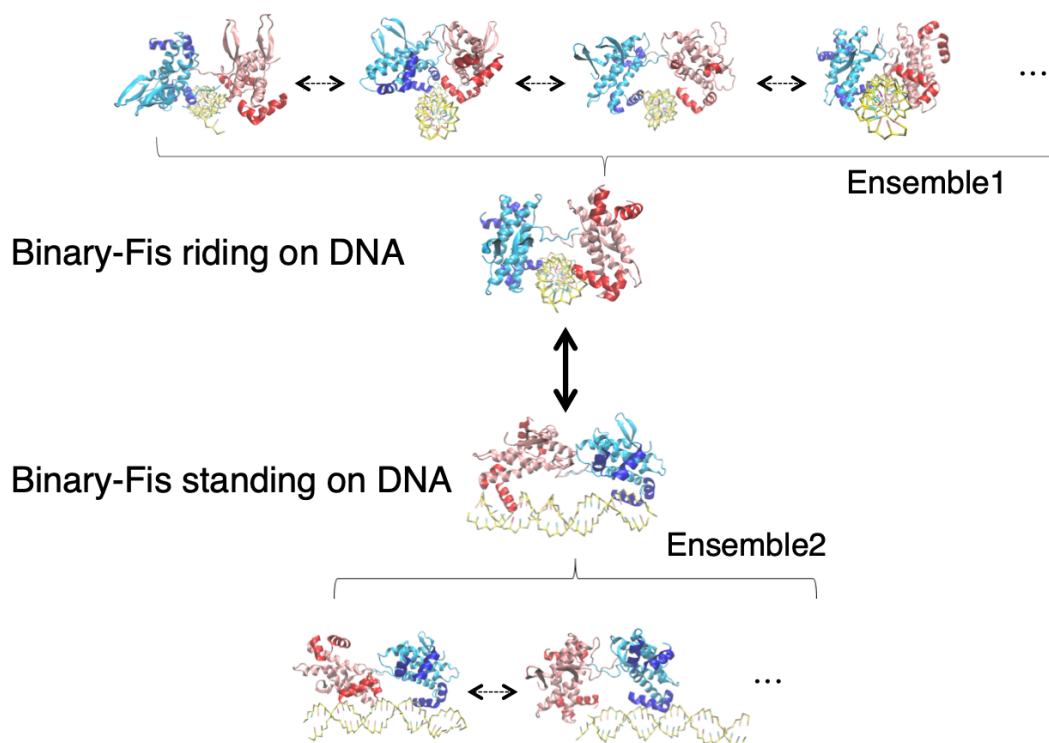

Figure S3. The structural ensemble of the binary-Fis configuration and their mutual dynamic switching are schematically shown.

The structural ensemble of the binary-Fis configuration on DNA contains two major categories of orientation: riding and standing. The binary-Fis structure can dynamically switch between the two distinct orientations by sliding along the DNA, denoted by a *black-thick* line with double arrows. In each of the categories, the structure of the protein-DNA ternary assemblies also shows multiple configurations. The *dashed-thin* lines with double arrows within individual ensemble 1 and 2 describe dynamic switching between each other. Note that only some example structures are shown.

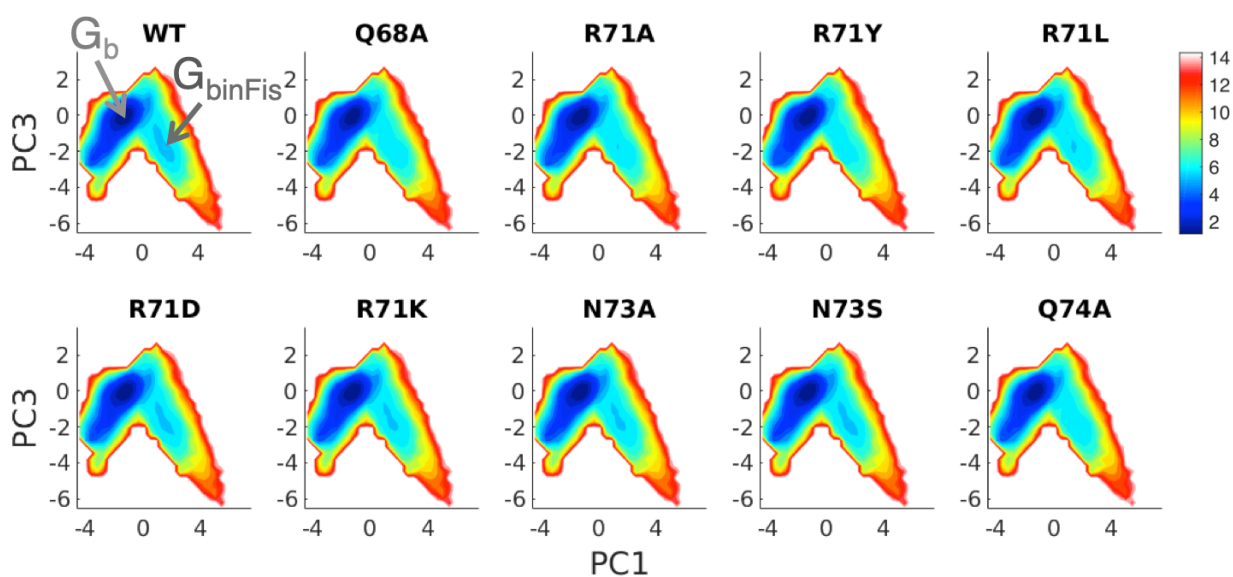

Figure S4. A free energy surface survey (free energy projected onto PC3-PC1) over a range of Fis mutants for the stability change of the binary-Fis molecular dyad is shown.

The free energy of the binary-Fis molecular dyad ( $G_{\text{binFis}}$ , shown in *dark gray*) is calculated with respect to the bound state ( $G_b$ , shown in *light gray*). One can thus calculate the free energy change  $\Delta G_{\text{WT}} = G_{\text{binFis}} - G_b$ ; Similarly for all of the mutants  $\Delta G_{\text{binFis}}(\text{mut}) = G_{\text{binFis}}(\text{mut}) - G_b$ . The  $\Delta\Delta G_{\text{binFis}}(\text{mut})$  is then calculated according to  $\Delta\Delta G_{\text{binFis}}(\text{mut}) = \Delta G_{\text{binFis}}(\text{mut}) - \Delta G_{\text{WT}}$ .

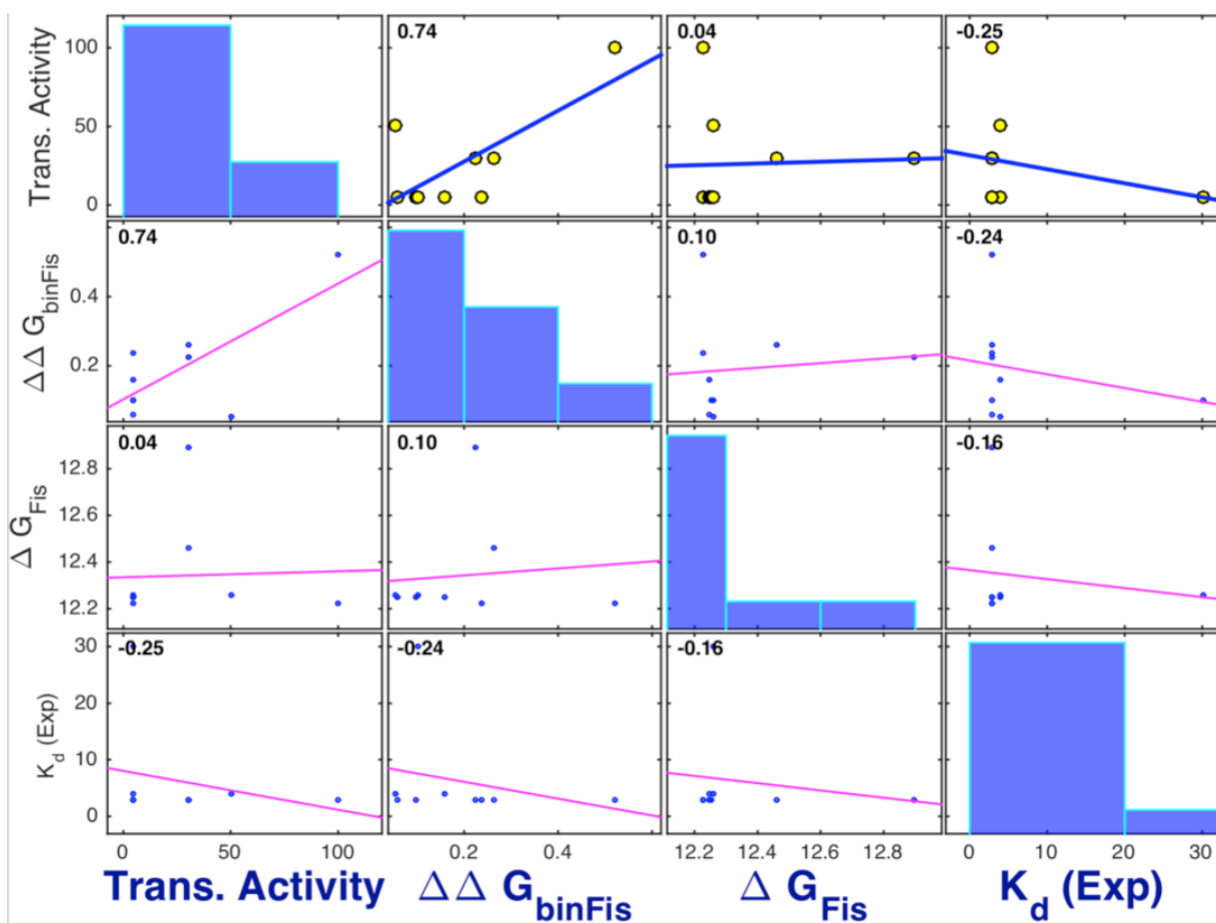

Figure S5. The correlation plot of the Fis transcription activity in relation to different thermodynamic properties due to mutation effects is shown.

Several of the thermodynamic properties such as  $\Delta G_{\text{Fis}}(\text{mut})$ ,  $\Delta\Delta G_{\text{binFis}}(\text{mut})$ , and experimental  $K_d$  (dissociation constant<sup>1</sup>) of the mutants are cross-correlated along with their corresponding transcription activity and are compared on the correlation matrix plot (using *corrplot* function in Matlab). The diagonal panels describe the distribution of individual datasets while the off-diagonal panels show the correlation plots of each pair of the variables. Note that  $\Delta\Delta G_{\text{binFis}}(\text{mut}) = \Delta G_{\text{binFis}}(\text{mut}) - \Delta G_{\text{WT}}$  and that  $\Delta G_{\text{Fis}}$  denotes the simulated free energy of dissociation of Fis from DNA. The number shown on the *top-left* of each panel represents the correlation coefficient ( $\rho_{X,Y}$ ). The Fis transcription activity shows a moderate correlation with  $\Delta\Delta G_{\text{binFis}}$  (with  $\rho_{X,Y}=0.74$ ).

## References

- (1) Cheng, Y. S.; Yang, W. Z.; Johnson, R. C.; Yuan, H. S. Structural Analysis of the Transcriptional Activation Region on Fis: Crystal Structures of Six Fis Mutants with Different Activation Properties. *J. Mol. Biol.* **2000**, *302* (5), 1139–1151.
